## OBSERVATIONS

## Early Glibenclamide Treatment in a Clinical Newborn With *KCNJ11* Gene Mutation

Activating mutations in the *KCNJ11* gene, which code for the ATP-sensitive K<sup>+</sup> channel subunit Kir6.2, are the most common cause of permanent neonatal diabetes. Recently, a switch from insulin treatment to oral sulfonylurea has been proposed if genetic testing reveals sulfonylurea-sensitive *KCNJ11* mutations (1). Until now, hurdles for early treatment were 1) the time until the mutation analysis is finished and 2) the lack of knowledge about adverse effects of glibenclamide in small infants.

We report on a boy with neonatal diabetes and the heterozygous *KCNJ11* mutation R201H who was successfully switched from insulin pump treatment (continuous subcutaneous insulin infusion [CSII]) to glibenclamide at 12 weeks of age. The boy was born small for gestational age (40 weeks, 2,660 g) as the first child to healthy, German parents. Until day 3 of age, poor feeding, weight loss, and a blood glucose level of 240 mg/dl was noticed. Hyperglycemia persisted,

and intravenous insulin treatment was started, followed by CSII. Genetic testing for *KCNJ11* and *ABCC8* mutations revealed a de novo heterozygous *KCNJ11* mutation (R201H) that has been recently reported (1) to respond well to glibenclamide treatment. Based on the experience in older children and the positive clinical prognosis in R201H mutation carriers, the child was switched from CSII to oral glibenclamide treatment in an in-hospital setting under monitoring with a continuous glucose monitoring system.

At present, glibenclamide is given at a dose of 0.15 mg · kg<sup>-1</sup> · day<sup>-1</sup> three times daily (maximum 0.2 · kg<sup>-1</sup> · day<sup>-1</sup>), and within a follow-up time of 8 weeks, no adverse effects had been observed. Continuous glucose monitoring system evaluation of two representative days on glibenclamide versus CSII showed decreased 24-h glucose levels (93 vs. 126 mg/dl) and lowered glucose variability (>180 mg/dl: zero vs. two and a half times per day; <70 mg/dl: zero vs. two times per day).

In summary, genetic testing enabled successful glibenclamide treatment as early as 3 months of age. Glibenclamide was superior to CSII in terms of glucose control and variability, without any short-term adverse effects. Further clinical trials are necessary to document the safety and efficacy of sulfonylurea treatment in children <12 months of age carrying sulfonylurea-sensitive *KCNJ11* mutations.

GERHARD DÄUBLIN, MD<sup>1</sup>  
BETTINA LORENZ-DEPIEREUX, PHD<sup>2,3</sup>  
TIM M. STROM, MD<sup>2,3</sup>  
OLIVER BLANKENSTEIN, MD<sup>4</sup>  
KLEMENS RAILE, MD<sup>4</sup>

From the <sup>1</sup>Children's Hospital Aurich, Aurich, Germany; the <sup>2</sup>GSF National Research Center for Environment and Health, Munich-Neuherberg, Germany; the <sup>3</sup>Institute of Human Genetics, Technical University, Munich, Germany; and the <sup>4</sup>Department of Pediatric Endocrinology and Diabetes, Charité Campus Virchow, Berlin, Germany.

Address correspondence to Klemens Raile, MD, Department of Pediatric Endocrinology and Diabetes, Charité Children's Hospital, Augustenburger Platz 1, 13353 Berlin, Germany. E-mail: klemens.raile@charite.de.

DOI: 10.2337/dc07-1318

© 2007 by the American Diabetes Association.

### References

1. Klupa T, Edghill EL, Nazim J, Sieradzki J, Ellard S, Hattersley AT, Malecki MT: The identification of a R201H mutation in *KCNJ11*, which encodes Kir6.2, and successful transfer to sustained-release sulfonylurea therapy in a subject with neonatal diabetes: evidence for heterogeneity of beta cell function among carriers of the R201H mutation. *Diabetologia* 48: 1029–1031, 2005
2. Codner E, Flanagan SE, Ugarte F, Garcia H, Vidal T, Ellard S, Hattersley AT: Sulfonylurea treatment in young children with neonatal diabetes: dealing with hyperglycemia, hypoglycemia, and sick days (Online Letter). *Diabetes Care* 30:e28–e29, 2007 (E-pub 2 March 2007)
